# Supplementary material for: Serum Klotho in Living Kidney Donors and Kidney Transplant Recipients: A Meta-Analysis
Source: PubMed Central journal article supplement (PMC7355868; doi:10.3390/jcm9061834), 2020-06-12
Supplement: jcm-09-01834-s001.pdf [file jcm-09-01834-s001.pdf]

## Supplementary Materials

Table S1. Search strategy.

### Ovid MEDLINE(R) and Epub Ahead of Print, In-Process & Other Non-Indexed Citations, Daily and Versions(R)

- 1 klotho.mp
- 2 kidney transplant.mp
- 3 kidney transplantation.mp.
- 4 exp kidney transplantation/
- 5 renal transplant.mp.
- 6 renal transplantation.mp
- 7 exp renal transplantation/
- 8 kidney donor.mp.
- 9 2 or 3 or 4 or 5 or 6 or 7 or 8
- 10 1 and 9

### EMBASE

('klotho protein' OR 'klotho gene') AND ('kidney transplantation' OR 'renal transplantation' OR kidney donor)

### Cochrane Database of Systematic Reviews

Cochrane Reviews matching ('klotho protein' OR 'klotho gene') AND ('kidney transplantation' OR 'renal transplantation' OR 'kidney donor') in Title Abstract Keyword
